# Supplementary material for: Perception, knowledge, and attitude of medical doctors in Saudi Arabia about the role of physiotherapists in vestibular rehabilitation: a cross-sectional survey
Source: PeerJ journal article supplement (doi:10.7717/peerj.13035), 2022-03-07
Supplement: Appendex_2.pdf [file Appendex_2.pdf]

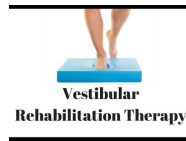

## Introduction

You are welcome to participate in our study about your perception of the role of the physiotherapist in vestibular rehabilitation.

You are eligible to participate if you are a medical doctor currently practicing in the kingdom of Saudi Arabia.

There are just 23 questions, which will take only 10 minutes of your time.

### Confidentiality:

Your answers will be protected and will maintain the privacy of your information. The researchers will not disclose or share your information with anyone.

Your participation is highly appreciated

Researcher,

### Dr. Danah Alyahya

Assistant Professor at Majmaah University

Email: d.al yahya@mu.edu.sa

### Mr. Faizan Zaffar Kashoo

Lecture at Majmaah University

Email: f.kashoo@mu.edu.sa

This research had Ethical approval from Majmaah University

**Ethics Number:** MUREC -April.7/COM-2021/31-1

**The study aims to evaluate the knowledge, amount of referrals, perception, and attitude of physicians towards the role of physical therapists in vestibular rehabilitation.**

### 1- Are you willing to participate in the survey?

Yes

No

**2- Your age?**

- 24 – 30 years old
- 31 – 40 years old
- 41 – 50 years old
- 51 – 60 years old
- Above 60

**3- Your gender?**

- Male
- Female

**4- Nationality**

**5- What is your Specialty as a medical doctor?**

- General Physicians
- Pediatricians
- General Surgeon
- Cardiologist
- Dentist
- Dermatologists
- Gynecologist
- ENT Specialist
- Neurology
- Family physician
- Psychiatrist
- Others, please specify

**6- Last professional degree obtained from**

**7- Years of experience do you have in medical field?**

- 1 – 3 years
- 4 – 8 years
- 9 – 15 years
- More than 15 years

**8- Which of the following province you are currently practicing in?**

- Riyadh
- Makkah
- Eastern
- Madinah
- Al Baha
- Al Jawf
- Northern Borders
- Qassim
- Ha'il
- Tabuk
- Aseer
- Jazan
- Najran

**9- Working Place?**

- Governmental Hospital
- Private hospital
- Clinic
- Others

**10- Did you see patients with Vestibular Disorder?**

- Yes
- No

**11- How many patients with vestibular disorder did you see per month?**

- Less than 5 patients
- 5 – 10 patients
- 11 – 20 patients
- More than 20 patients

**12- What is the most common cases that you diagnosed with vestibular disorder? (You can choose more than one).**

- Benign Paroxysmal Positional Vertigo (BPPV)
- Vestibular Neuritis
- Unilateral/Bilateral Vestibular Hypofunction
- Vestibular Migraine
- Meniere's Disease
- Vestibular Paroxysmal
- Mal de Debarquement
- Perilymphatic Fistula
- Cervicogenic Dizziness
- Traumatic Brain Injury
- Motion Sensitivity
- Multiple Sclerosis
- Others

**13- Who do you think can provide better vestibular rehabilitation? (You can choose more than one option)**

- My self
- ENT
- Audiologist
- Physical therapist
- Occupational therapist
- Nurses
- Others, please specify

**14- Are you aware that physiotherapists are trained to provide vestibular rehabilitation?**

- Yes

No

**15- Do you think physiotherapists are able to assess and diagnose patients with vestibular disorders?**

Yes

No

**16- Why do you think physiotherapist can NOT assess and diagnose the patient with vestibular disorders? (you can choose more than one)**

Not applicable

Not aware that physiotherapy can evaluate vestibular disorder patients

Insufficient of knowledge

Less confidence

Less experience

Others

**17- Do you think physiotherapists will be able to treat patients with vestibular disorders?**

Yes

No

**18- Why do you think physiotherapist can NOT treat the patient with vestibular disorders? (you can choose more than one)**

Not applicable

Not aware that physiotherapy can evaluate vestibular disorder patients

Insufficient of knowledge

Less confidence

Less experience

Others

**19- What type of patients do you refer to physiotherapist? (You can choose more than one).**

- None.
- Benign Paroxysmal Positional Vertigo (BPPV)
- Vestibular Neuritis
- Unilateral/Bilateral Vestibular Hypofunction
- Vestibular Migraine
- Meniere's Disease
- Vestibular Paroxysmal
- Mal de Debarquement
- Perilymphatic Fistula
- Cervicogenic Dizziness
- Traumatic Brain Injury
- Motion Sensitivity
- Multiple Sclerosis
- Others

**20. Rate the physiotherapist involvement in the management of the following disorders**

|                                              | No role               | Involvement in assessment | Involvement in assessment and treatment | Haven't seen the cases |
|----------------------------------------------|-----------------------|---------------------------|-----------------------------------------|------------------------|
| Benign Paroxysmal Positional Vertigo (BPPV)  | <input type="radio"/> | <input type="radio"/>     | <input type="radio"/>                   | <input type="radio"/>  |
| Vestibular Neuritis                          | <input type="radio"/> | <input type="radio"/>     | <input type="radio"/>                   | <input type="radio"/>  |
| Unilateral/Bilateral Vestibular Hypofunction | <input type="radio"/> | <input type="radio"/>     | <input type="radio"/>                   | <input type="radio"/>  |
| Vestibular Migraine                          | <input type="radio"/> | <input type="radio"/>     | <input type="radio"/>                   | <input type="radio"/>  |
| Meniere's Disease                            | <input type="radio"/> | <input type="radio"/>     | <input type="radio"/>                   | <input type="radio"/>  |
| Vestibular Paroxysmal                        | <input type="radio"/> | <input type="radio"/>     | <input type="radio"/>                   | <input type="radio"/>  |
| Mal de Debarquement                          | <input type="radio"/> | <input type="radio"/>     | <input type="radio"/>                   | <input type="radio"/>  |
| Perilymphatic Fistula                        | <input type="radio"/> | <input type="radio"/>     | <input type="radio"/>                   | <input type="radio"/>  |
| Cervicogenic Dizziness                       | <input type="radio"/> | <input type="radio"/>     | <input type="radio"/>                   | <input type="radio"/>  |
| Traumatic Brain Injury                       | <input type="radio"/> | <input type="radio"/>     | <input type="radio"/>                   | <input type="radio"/>  |
| Motion Sensitivity                           | <input type="radio"/> | <input type="radio"/>     | <input type="radio"/>                   | <input type="radio"/>  |
| Multiple Sclerosis                           | <input type="radio"/> | <input type="radio"/>     | <input type="radio"/>                   | <input type="radio"/>  |

**21- Which of the following assessment method do you think physiotherapists can apply effectively? (You can choose more than one).**

- None
- Dix-Hallpick test
- Roll test
- Side-lying test
- Head Impulse Test/ Head Thrust Test
- Head Shaking Nystagmus Test
- Dynamic Visual Acuity Test
- Oculomotor examination
- VOR Cancellation
- Modified Clinical Test of Sensory Interaction and Balance
- I am not aware about these tests
- Others

**22- Which of the following treatment method do you think physiotherapists can apply effectively? (You can choose more than one)**

- None
- Canalith Repositioning Maneuver / (Ebly) Maneuver
- Semont Maneuver
- Gufoni / Casani Maneuver
- Barbecue Roll Maneuver
- Imaginary Target Exercise
- Vestibulo-ocular reflex Adaptation 1 (VOR 1)
- Vestibulo-ocular reflex Adaptation 2 (VOR 2)
- Substitution Exercises: Active Eye Movements Between Two Targets
- Habituation Exercise (Brandt - Daroff Maneuver)
- I am not aware about these treatment methods.
- I am not sure about the effectiveness of these treatment methods.
- Others

**23- Did you ever get feedback from the patients after your referral to a physiotherapist? What was the patient feedback?**

- Never got feedback from patients
- Not satisfied
- Moderately satisfied
- Highly satisfied

Powered by Qualtrics
